# Supplementary material for: Tempol Reverses the Negative Effects of Morphine on Arterial Blood-Gas Chemistry and Tissue Oxygen Saturation in Freely-Moving Rats
Source: PubMed Central journal article supplement (PMC8493249; doi:10.3389/fphar.2021.749084), 2021-09-22
Supplement: DataSheet1.pdf [file DataSheet1.pdf]

## Supplemental File

### Tempol reverses the negative effects of morphine on arterial blood-gas chemistry and tissue oxygen saturation in freely-moving rats

Santhosh M. Baby,<sup>1,†</sup> Joseph F. Discala,<sup>1</sup> Ryan Gruber,<sup>1</sup> Paulina M. Getsy,<sup>2</sup> Feixiong Cheng,<sup>3</sup>

Derek S. Damron,<sup>4</sup> Stephen J. Lewis<sup>2,5\*</sup>

<sup>1</sup>Galleon Pharmaceuticals, Inc., 213 Witmer Road, Horsham, PA, USA

<sup>2</sup>Department of Pediatrics, Case Western Reserve University, Cleveland, OH, USA

<sup>3</sup>Genomic Medicine Institute, Lerner Research Institute, Cleveland Clinic, Cleveland, OH, USA

<sup>4</sup>Department of Biological Sciences and School of Biomedical Sciences,

Kent State University, Kent, OH, USA

<sup>5</sup>Department of Pharmacology, Case Western Reserve University, Cleveland, OH, USA

**†Current address:** Santhosh M. Baby, Translational Sciences Treatment Discovery, Galvani Bioelectronics, Inc., 1250 S Collegeville Rd., Collegeville, Pennsylvania 19426.  
Email: [santhosh.m.baby@galvani.bio](mailto:santhosh.m.baby@galvani.bio)

**\*Corresponding Author:**

Stephen J. Lewis, PhD  
Department of Pediatrics, Division of Pulmonology, Allergy and Immunology  
Department of Pharmacology School of Medicine  
Biomedical Research Building, Room 831  
Case Western Reserve University  
10900 Euclid Avenue  
Cleveland, OH 44106-4984  
Phone: 216-368-3482  
Email: [sjl78@case.edu](mailto:sjl78@case.edu)

**Supplemental Table 1.** Baseline parameters

| Parameter                      | Saline (ml/kg) | Tempol (mg/kg, IV) |            |
|--------------------------------|----------------|--------------------|------------|
|                                |                | 60                 | 100        |
| Number of rats                 | 9              | 3                  | 10         |
| SpO <sub>2</sub> , %           | 96.0 ± 0.5     | 97.5 ± 0.3         | 96.6 ± 0.5 |
| SBP, mmHg                      | 129 ± 5        | 129 ± 5            | 120 ± 2    |
| DBP, mmHg                      | 148 ± 4        | 139 ± 5            | 136 ± 3    |
| MAP, mmHg                      | 135 ± 4        | 132 ± 5            | 126 ± 3    |
| Heart rate, beats/min          | 368 ± 13       | 352 ± 43           | 393 ± 15   |
| Heart rate/MAP, mmHg/beats/min | 2.9 ± 0.2      | 2.7 ± 0.4          | 3.1 ± 0.1  |

SBP, systolic arterial blood pressure. DBP, diastolic arterial blood pressure. MAP, mean arterial blood pressure. SpO<sub>2</sub>, tissue O<sub>2</sub> saturation. The data are presented as mean ± SEM. There were no between group differences for any parameter (P > 0.05 for all comparisons).

## Supplemental Figure 1

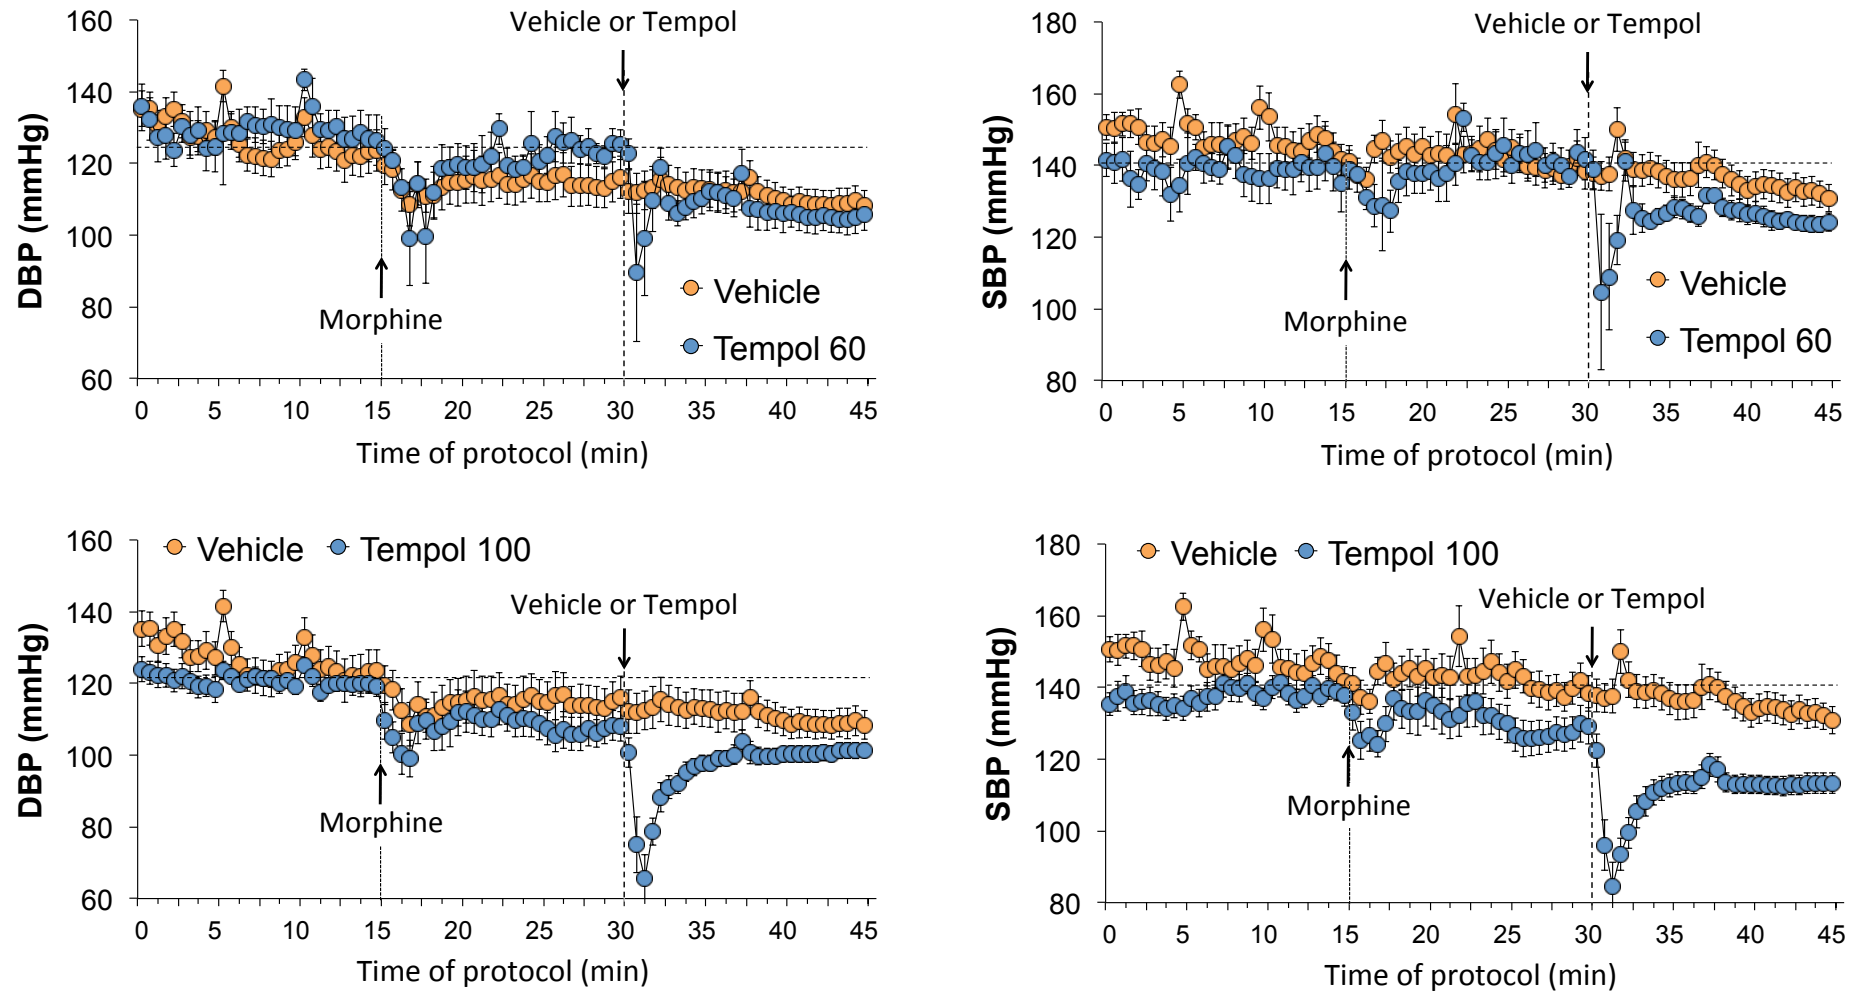

**Supplementary Figure 1.** Changes in diastolic arterial blood pressure (DBP) and systolic arterial blood pressure (SBP) elicited by bolus injection of morphine (10 mg/kg, IV) and the subsequent injection of vehicle (saline), Tempol at 60 mg/kg, IV (Tempol 60) or Tempol at 100 mg/kg, IV (Tempol 100) in freely-moving rats. Data are shown as mean  $\pm$  SEM. The numbers of rats in vehicle, Tempol 60 and Tempol 100 groups were 9, 3 and 10, respectively.

## Supplemental Figure 2

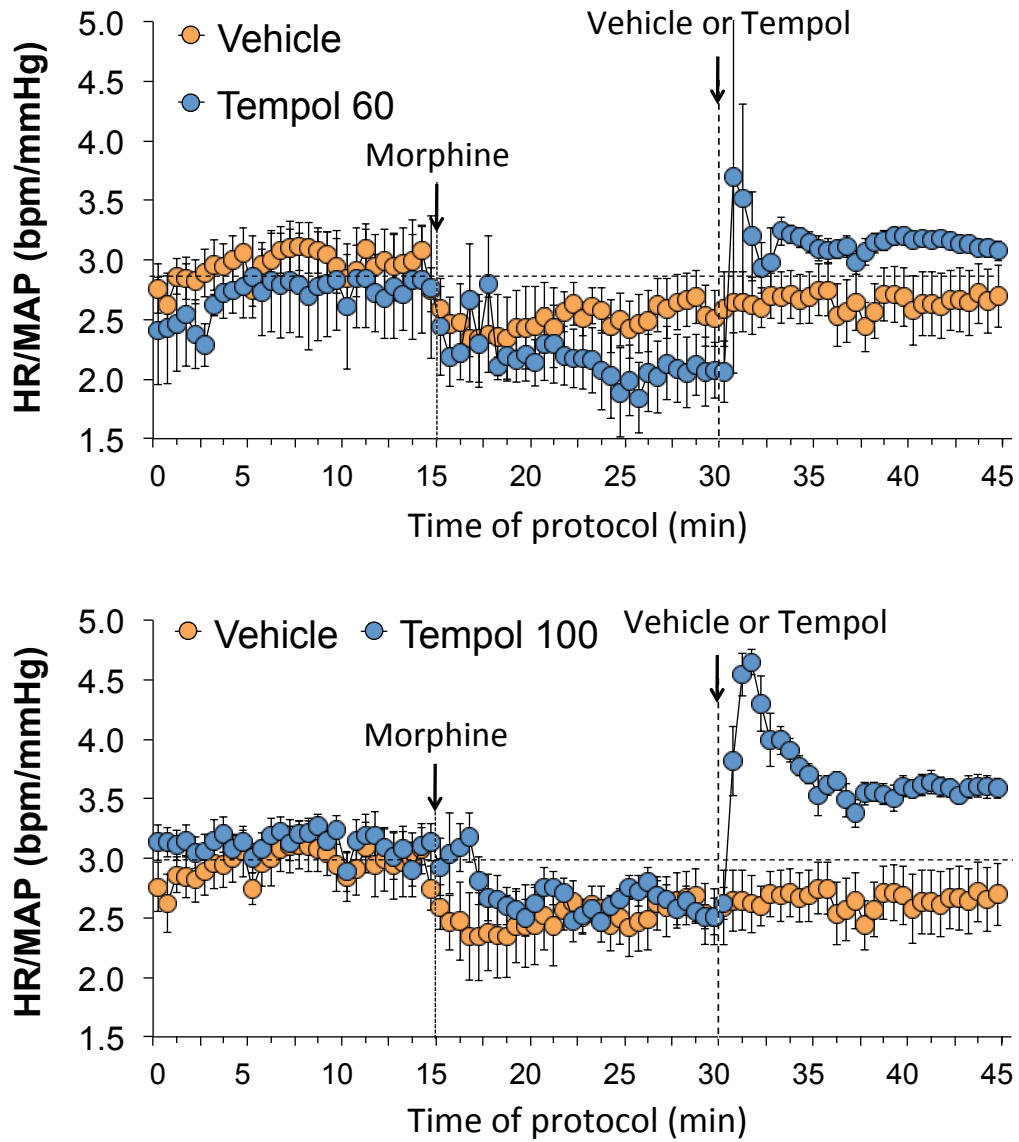

**Supplementary Figure 2.** Changes in mean arterial blood pressure/heart rate ratios (HR/MAP) elicited by bolus injection of morphine (10 mg/kg, IV) and subsequent injection of vehicle (saline), Tempol at 60 mg/kg, IV (Tempol 60) or Tempol at 100 mg/kg, IV (Tempol 100) in freely-moving rats. Data are shown as mean  $\pm$  SEM. The numbers of rats in vehicle, Tempol 60 and Tempol 100 groups were 9, 3 and 10, respectively.
